# Supplementary material for: Glutathione Peroxidase 3 Delivered by hiPSC-MSCs Ameliorated Hepatic IR Injury via Inhibition of Hepatic Senescence
Source: PubMed Central journal article supplement — Theranostics. 2018 Jan 1;8(1):212–22. doi: 10.7150/thno.21656 (PMC5743470; doi:10.7150/thno.21656), 2018-01-01
Supplement: thnov08p0212s1.pdf [file thnov08p0212s1.pdf]

### Supplementary Figure. 1

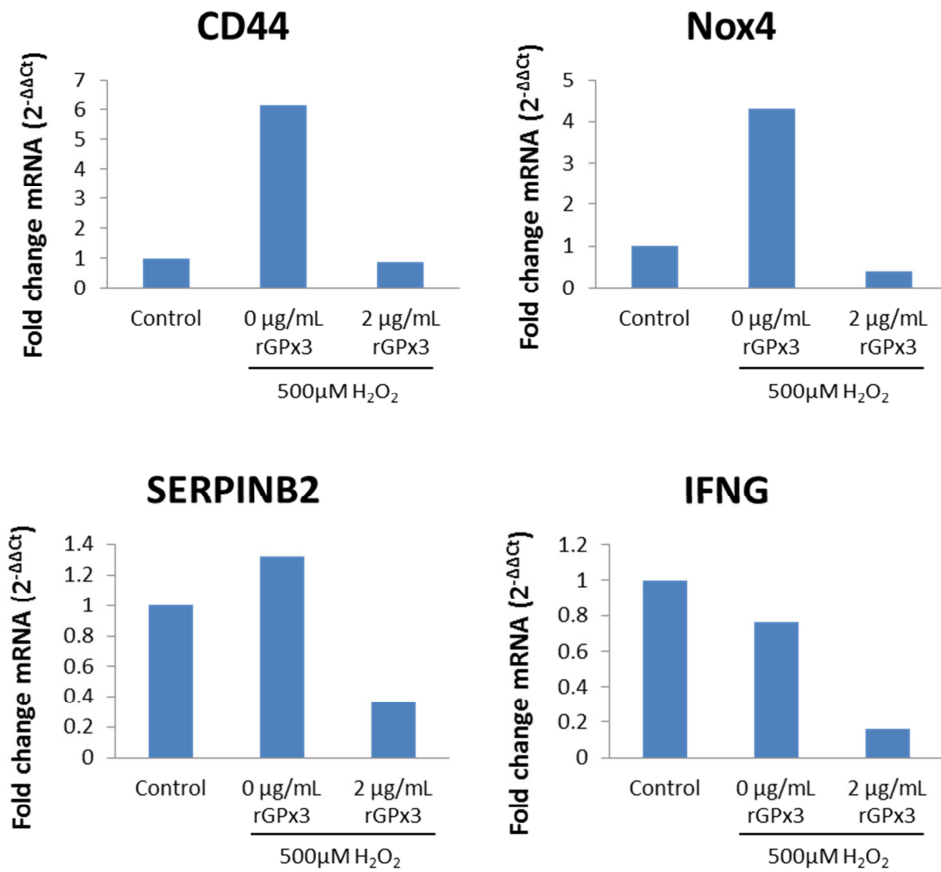

Supplementary Figure. 1. Four gene candidates were identified to be responsible for suppressive effect of GPx3 on hepatic senescence.

## Supplementary Figure. 2

**A**

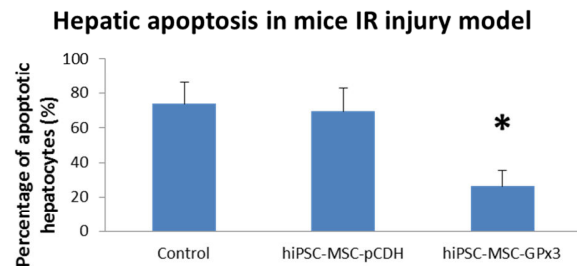

**B**

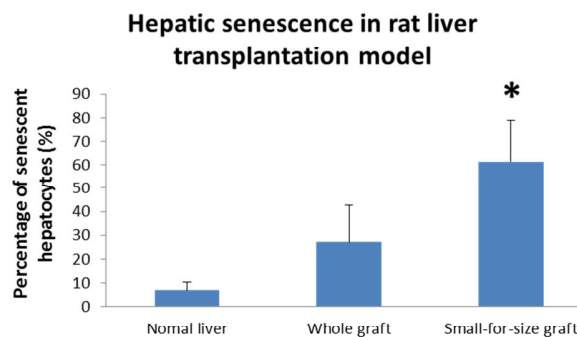

**C**

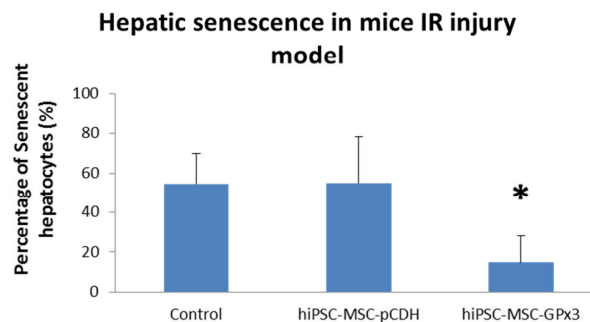

Supplementary Figure. 2. Quantification analysis. (A) Quantification of percentage of apoptotic hepatocytes in mice IR injury model. \* $P < 0.05$  vs Control & hiPSC-MSC-pCDH groups. (B) Quantification of percentage of senescent hepatocytes in orthotopic rat liver transplantation model. \* $P < 0.05$  vs normal liver & whole graft groups. (C) Quantification of percentage of senescent hepatocytes in mice IR injury model. \* $P < 0.05$  vs Control & hiPSC-MSC-pCDH groups.
